# Supplementary material for: Polypropylene sulphide coating on magnetic nanoparticles as a novel platform for excellent biocompatible, stimuli-responsive smart magnetic nanocarriers for cancer therapeutics
Source: Royal Society of Chemistry journal article supplement (doi:10.1039/d2nr05218k), 2023-01-01
Supplement: d2nr05218k1.pdf [file d2nr05218k1.pdf]

## Supporting Information

### **Polypropylene Sulphide Coating on Magnetic NPs as a Novel Platform for Excellent Biocompatible, Stimuli Responsive Smart Magnetic Nanocarrier for Cancer Therapeutics**

Meenakshi Chauhan<sup>†,1</sup>, Suparna Mercy Basu<sup>†,1</sup>, Mohd Qasim<sup>1</sup>, Jyotsnendu Giri<sup>1,\*</sup>

<sup>1</sup>Department of Biomedical Engineering, Indian Institute of Technology Hyderabad, Kandi, Telangana, India

<sup>†</sup>*These Authors Equally Contributed to This Work*

\*Corresponding Author:

Dr. Jyotsnendu Giri

Associate Professor

Department of Biomedical Engineering

Indian Institute of Technology Hyderabad

Telangana - 502284

Email address: [enarm@bme.iith.ac.in](mailto:enarm@bme.iith.ac.in), [jgiri@bme.iith.ac.in](mailto:jgiri@bme.iith.ac.in)

## Tables

| S. No | Nanoparticles     | Size (nm) | PDI           | Zeta potential |
|-------|-------------------|-----------|---------------|----------------|
| 1     | PPS NPs           | 89± 9     | 0.243 ±0.015  | -10 ± 3        |
| 2     | PPS-MnFe NPs      | 90 ± 13   | 0.190 ± 0.007 | -12 ± 2        |
| 3     | PPS-DOX NPs       | 87± 5     | 0.193± 0.003  | -8 ± 4         |
| 4     | PPS- MnFe-DOX NPs | 114± 10   | 0.155±0.010   | -9 ± 4         |

**Table .1** Different NPs size (diameter in nm) with corresponding PDI and zeta potential

| Types of NPs | SAR (W/g) | ILP (nHm <sup>2</sup> /kg) |
|--------------|-----------|----------------------------|
| DMSA- Fe     | 115       | 1.16                       |
| DMSA- MnFe   | 214.5     | 2.16                       |
| DMSA- CoFe   | 109       | 1.10                       |
| PPS- Fe      | 136       | 1.37                       |
| PPS- MnFe    | 245       | 2.5                        |
| PPS- CoFe    | 78.5      | 0.79                       |

**Table 2.** SAR and ILP value of DMSA-MNPs and PPS-MNPs under AMF treatment of 993 kHz frequency.

## Figures

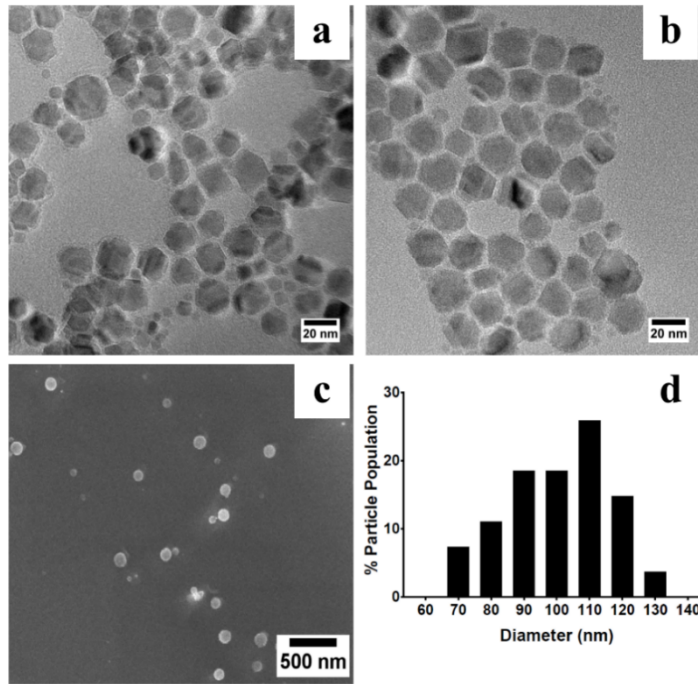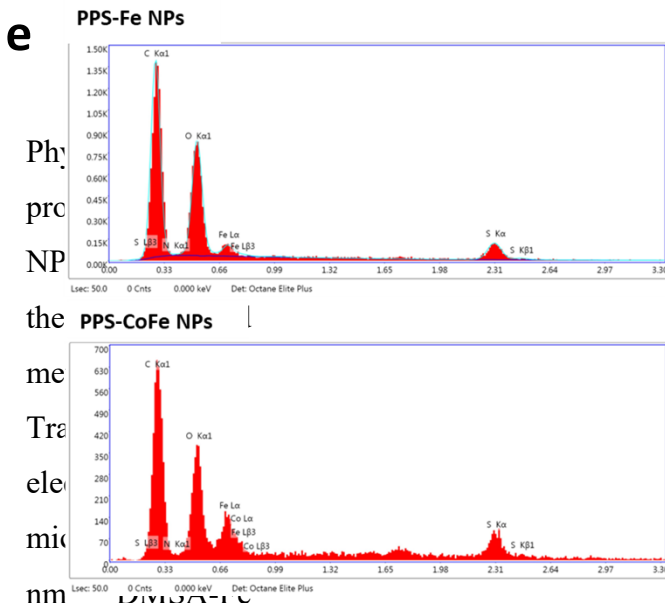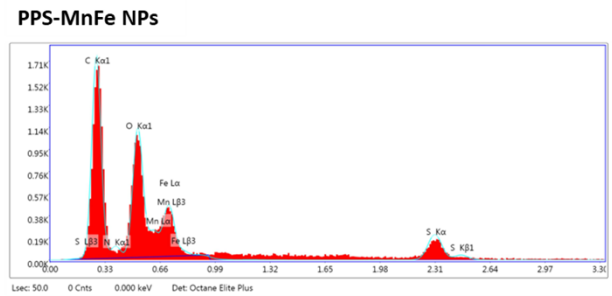

| PPS-Fe NPs |          | PPS-MnFe NPs |          | PPS-CoFe NPs |          |
|------------|----------|--------------|----------|--------------|----------|
| Element    | Weight % | Element      | Weight % | Element      | Weight % |
| C K        | 51.90    | C K          | 43.22    | C K          | 45.94    |
| O K        | 24.93    | O K          | 20.55    | O K          | 17.21    |
| Fe L       | 3.44     | Mn L         | 1.23     | Fe L         | 9.41     |
| S K        | 19.73    | Fe L         | 13.00    | Co L         | 1.47     |
|            |          | S K          | 22.01    | S K          | 25.97    |

NPs. (b)

Transmission

electron

microgram of 16

nm DMSA-CoFe

NPs. (c)

Scanning

electron microscopy (SEM) images of PPS MNPs. (d) Particles size distribution of the PPS- MNPs NPs obtained from the SEM images. (e) Energy Dispersive Spectroscopy (EDS) elemental analysis of the different PPS-MNPs i.e. PPS-Fe, PPS-MnFe PPS-CoFe.

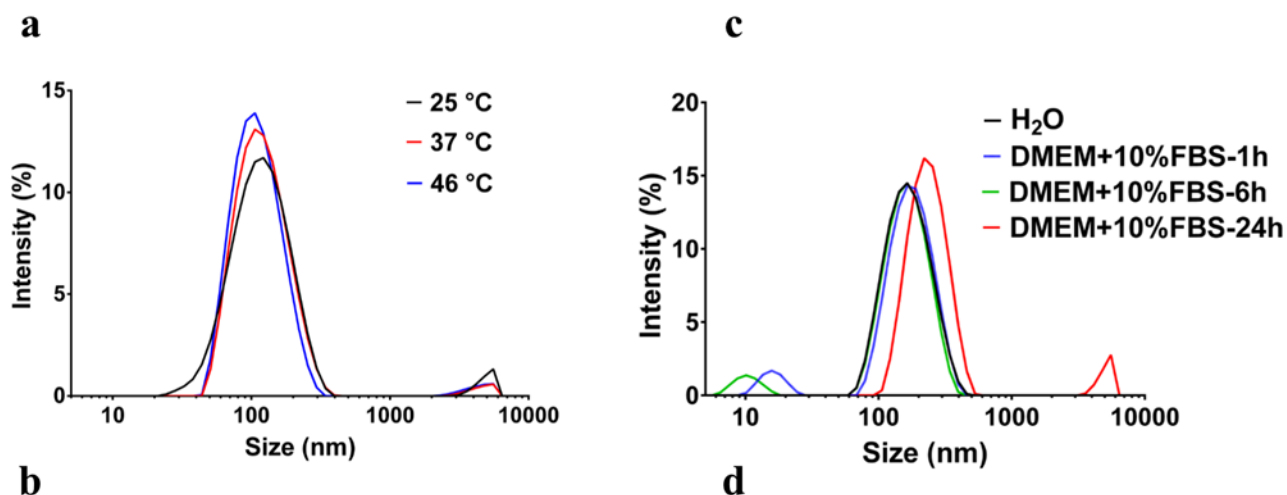

| Temperature (°C) | Size (nm)  | PDI            |
|------------------|------------|----------------|
| 25               | 114±3      | 0.247667±0.008 |
| 37               | 108.2667±4 | 0.172333±0.003 |
| 46               | 105.3±2    | 0.163333±0.002 |

| Media            | Z-Ave d (nm) | PDI          |
|------------------|--------------|--------------|
| H <sub>2</sub> O | 110.2 ±2     | 0.154±0.005  |
| DMEM+10%FBS-1hr  | 129±7        | 0.322±0.009  |
| DMEM+10%FBS-6h   | 124.1±9      | 0.308±0.0027 |
| DMEM+10%FBS-24h  | 226.7±20     | 0.356±0.040  |

**Fig. SI 2.** Stability of the magnetic NPs (PPS-MnFe NPs) (a) Graph and (b) Table shows stability of the NPs in the different temperature (25, 37, 46 °C) for hyperthermia application. (c) Graph and (d) Table shows the serum stability study of the magnetic NPs in different time points 1, 6 and 24 h and in water at 37 °C.

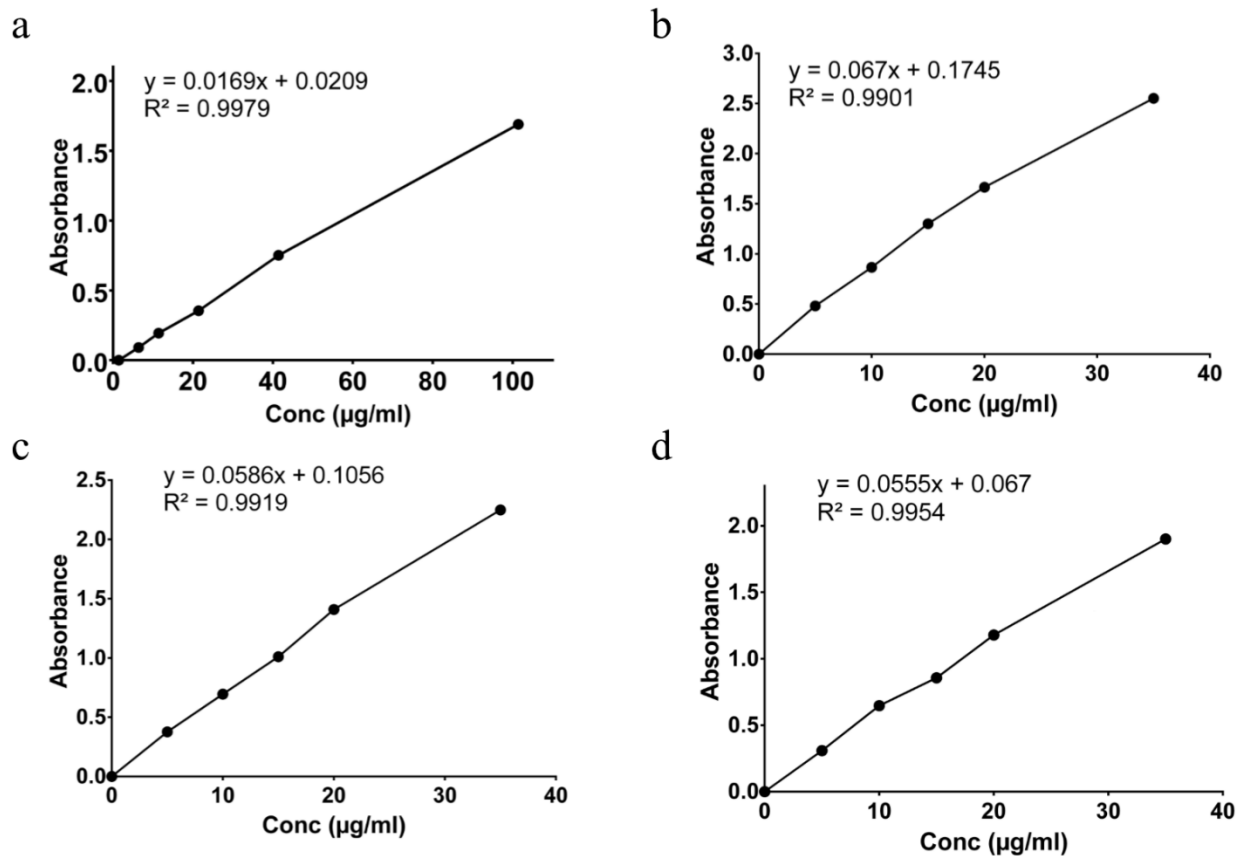

**Fig. SI 3.** Quantification calibration curves for doxorubicin and magnetic NPs (a) Calibration curve for doxorubicin in DMSO solvent at absorbance 480 nm. Calibration curves for quantification of (b) Fe, (c) MnFe, and (d) CoFe NPs using colorimetric analysis at absorbance 480 nm.

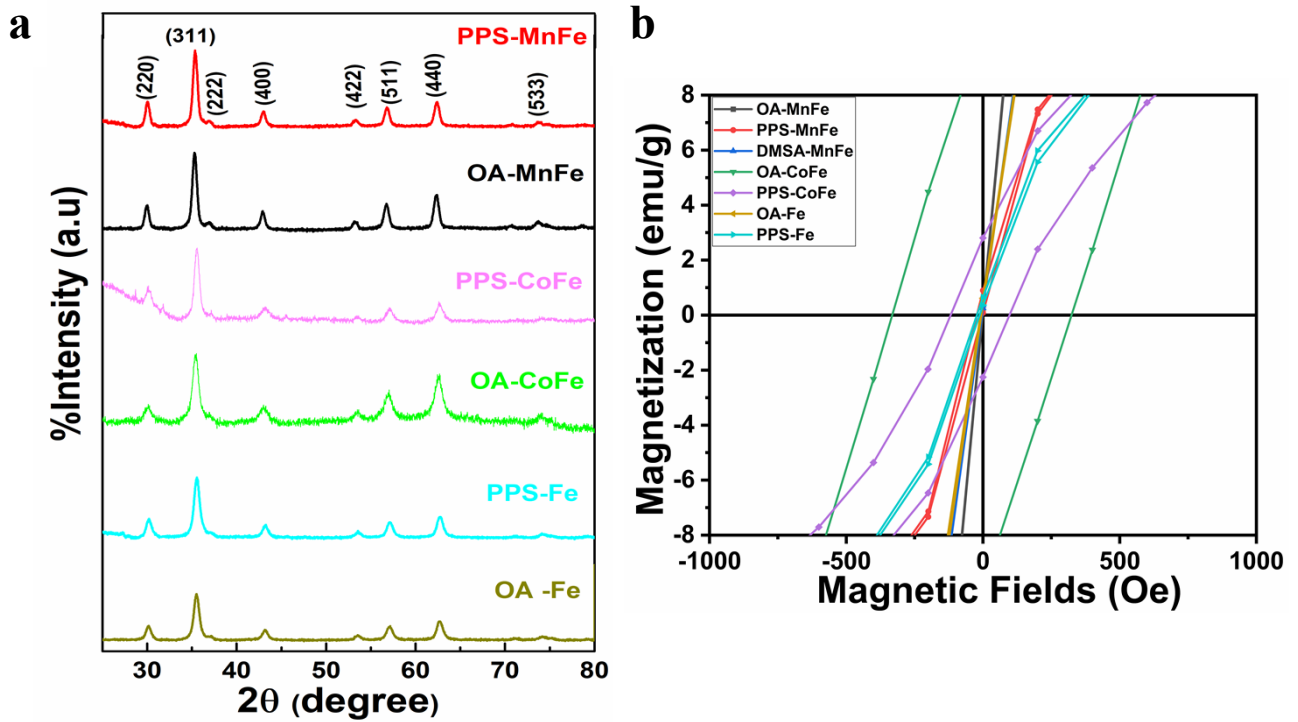

**Fig. SI 4.** (a) X-ray diffraction patterns of OA-MNPs and PPS-MNPs. These graphs indicate the crystalline structure of OA-MNPs and PPS-MNPs (b) Magnified graph of the M- H loop at a low magnetic field ( $\square$ 1000 to 100), where coercive field ( $H_c$ ) of CoFe NPs (PPS coated and Plain) is higher than the other NPs, which proves that Fe and MnFe NPs have better superparamagnetic behaviour compare to CoFe NPs.

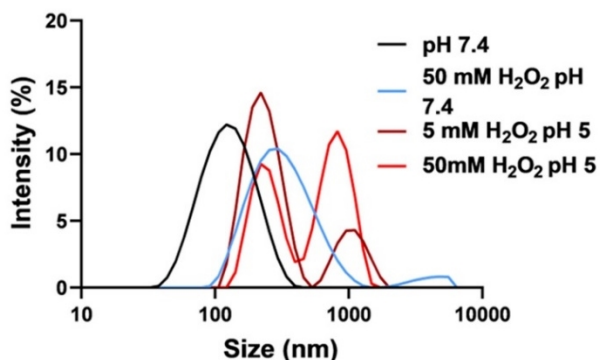

| Condition                                 | Size (nm) | PDI         |
|-------------------------------------------|-----------|-------------|
| pH 7.4                                    | 80±10     | 0.196±0.015 |
| 50mM H <sub>2</sub> O <sub>2</sub> pH 7.4 | 230±31    | 0.39±0.037  |
| 5mM H <sub>2</sub> O <sub>2</sub> pH 5    | 250±60    | 0.50±0.19   |
| 50mM H <sub>2</sub> O <sub>2</sub> pH 5   | 750       | 1.00±0.02   |

**Fig. SI 5.** Gaussian distributions of the hydrodynamic diameter of PPS-MnFe-CUR shows the effect of different conditions i.e low pH and high ROS or dual stimuli i.e combination of ROS and pH to stimulate the cancer cells microenvironment. In this graph PPS-MNP shows the drastic increase in size to 700 nm with PDI > 0.8 under dual stimuli condition compared to physiological condition where size is 150 nm.

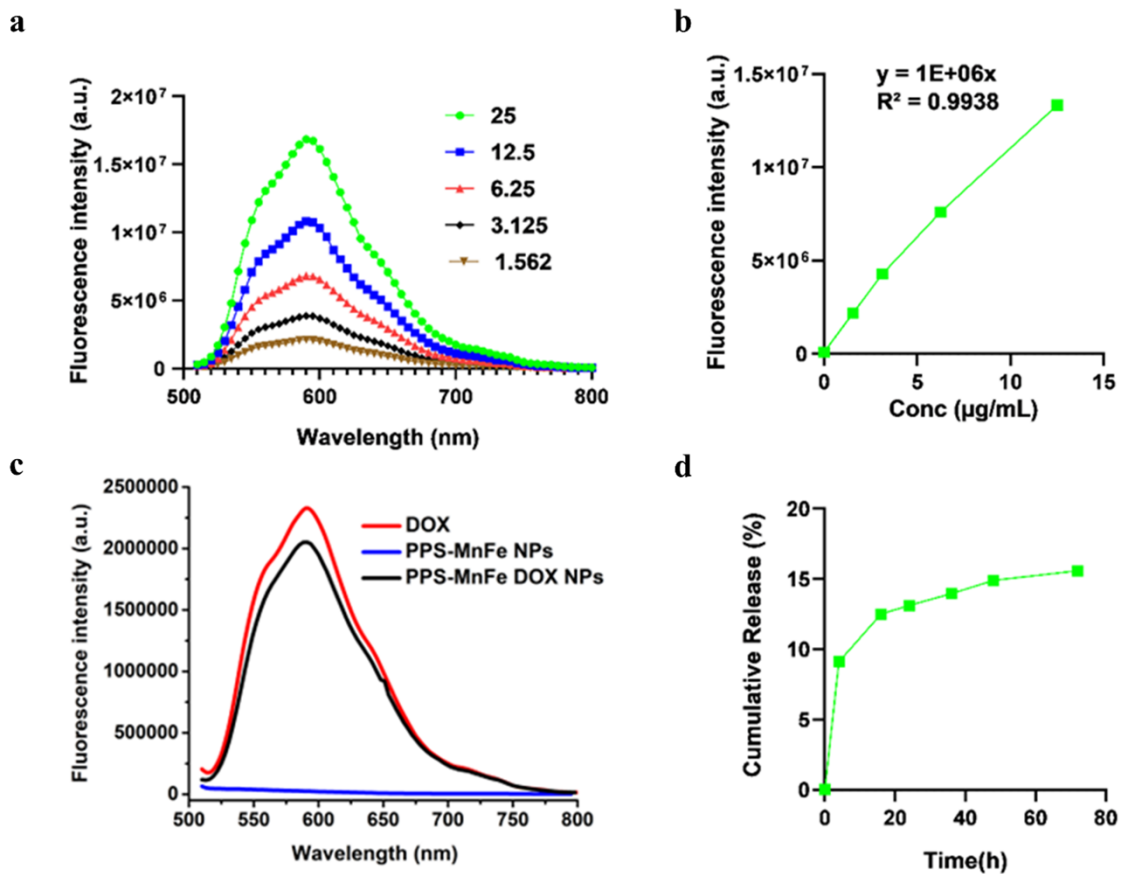

**Fig. SI 6.** Loading and release profile of the DOX from PPS-MnFe-DOX NPs (a) fluorescence spectra of DOX at various concentrations. (b) calibration curve of DOX. (c) fluorescence spectra of dox-loaded MNPs (PPS-MnFe DOX NPs) compared with free DOX and Plain PPS-MnFe NPs. (d) release profile of DOX from PPS-MnFe DOX NPs up to 72 hours under physiological conditions.



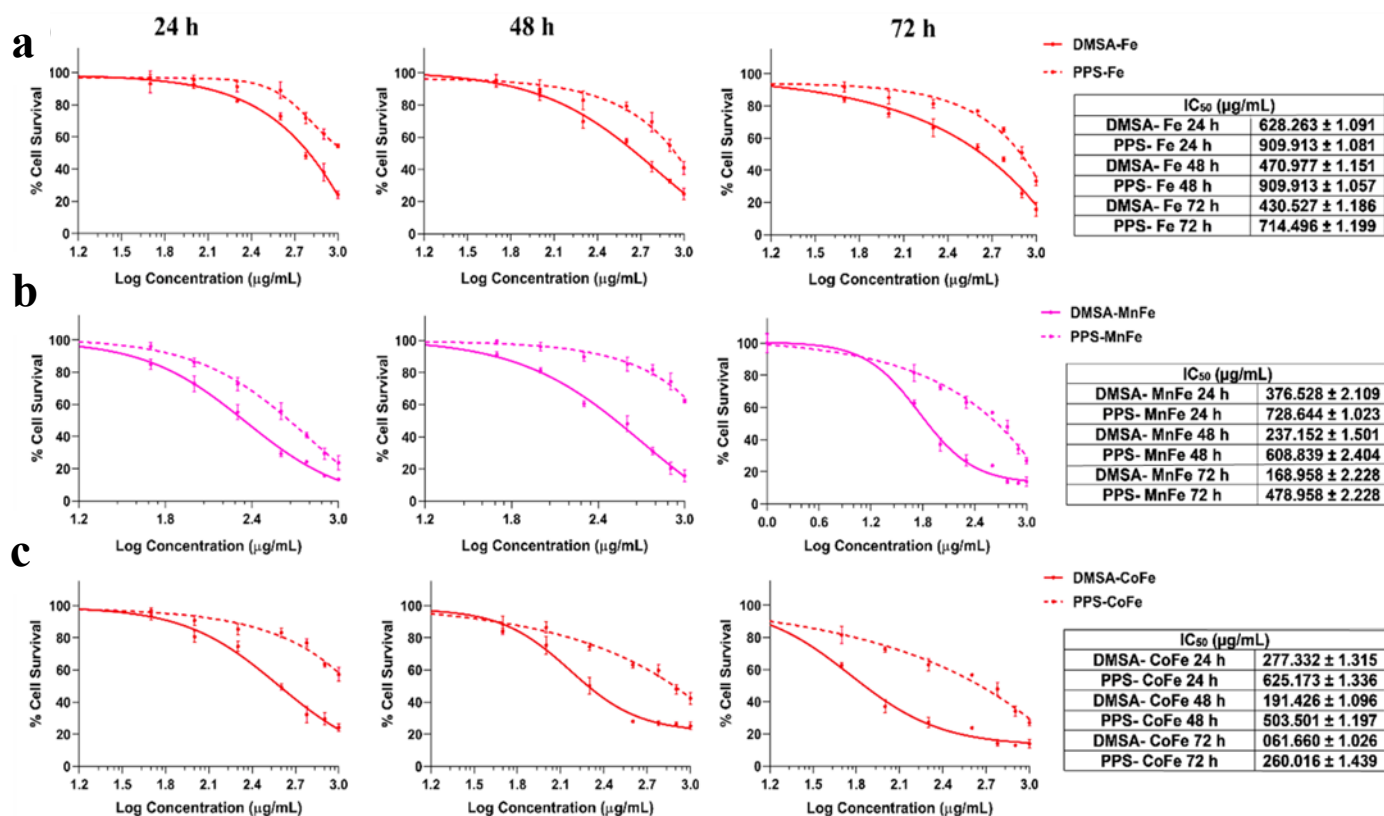

**Fig. SI 7.** (a) Cell viability assessment by MTS assay of HEK293 cells with DMSA-Fe NPs (solid line) and PPS-Fe NPs (dashed line) with variable concentrations (0-1000 µg/mL) for 24, 48 and 72 h incubation along with the IC<sub>50</sub> values. (b) Cell viability assessment by MTS assay of HEK293 cells with DMSA-MnFe NPs (solid line) and PPS-MnFe NPs (dashed line) with variable concentrations (0-1000 µg/mL) for 24, 48 and 72 h incubation along with the IC<sub>50</sub> values. (c) Cell viability assessment by MTS assay of HEK293 cells with DMSA-CoFe NPs (solid line) and PPS-CoFe NPs (dashed line) with variable concentrations (0-1000 µg/mL) for 24, 48 and 72 h incubation along with the IC<sub>50</sub> values.

**a**

NIH3T3

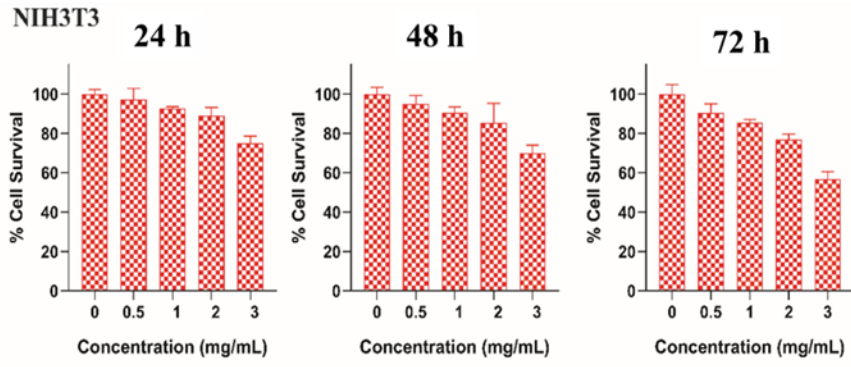**b**

HEK293

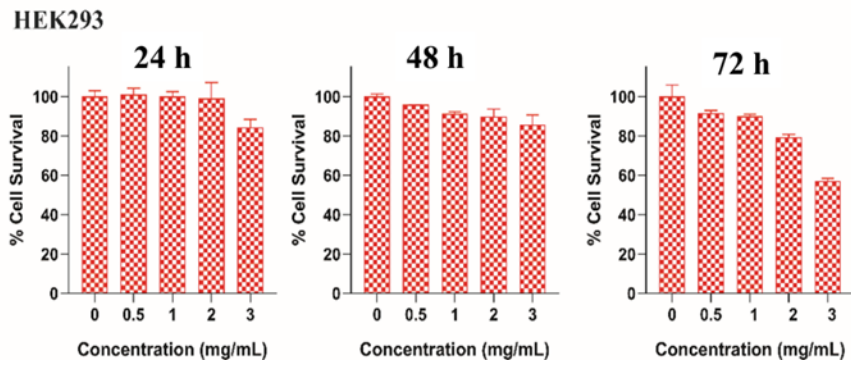

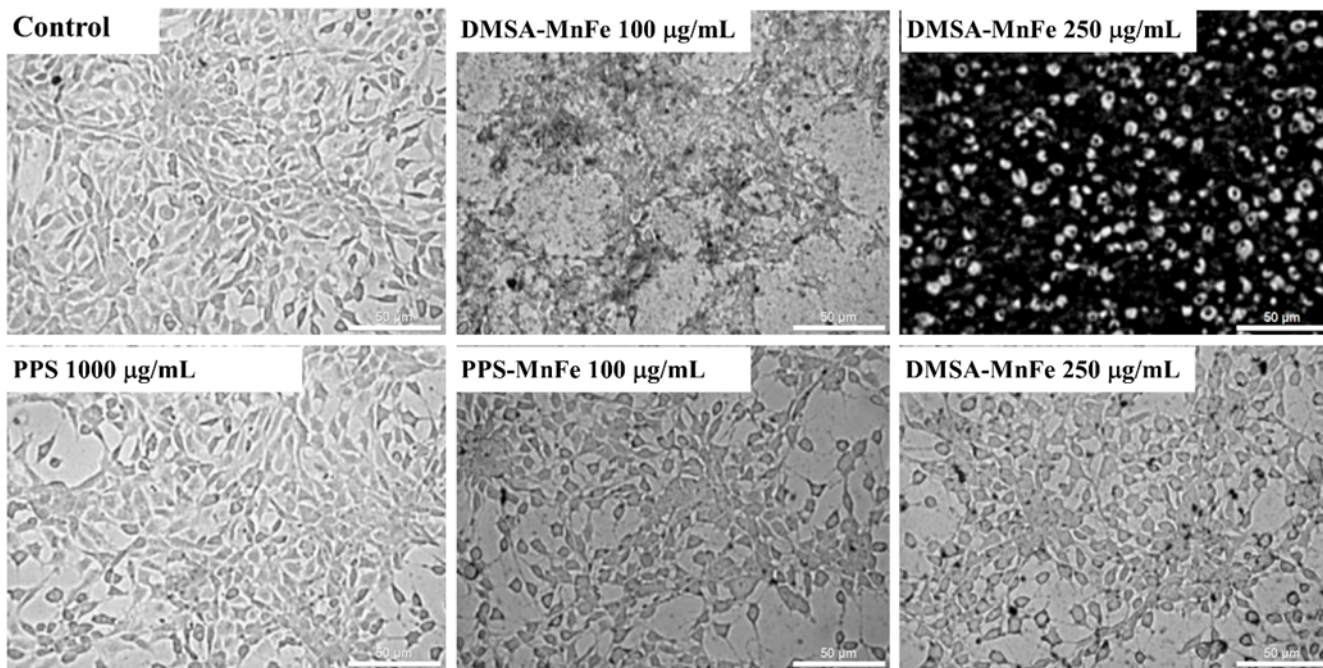

**Fig. SI 9.** Brightfield images of NIH3T3 cells treated with blank PPS NPs (1000 µg/mL), DMSA and PPS coated MnFe NPs at 100 µg/mL and 250 µg/mL concentrations for 72 h. *Scale bar: 50 µm*

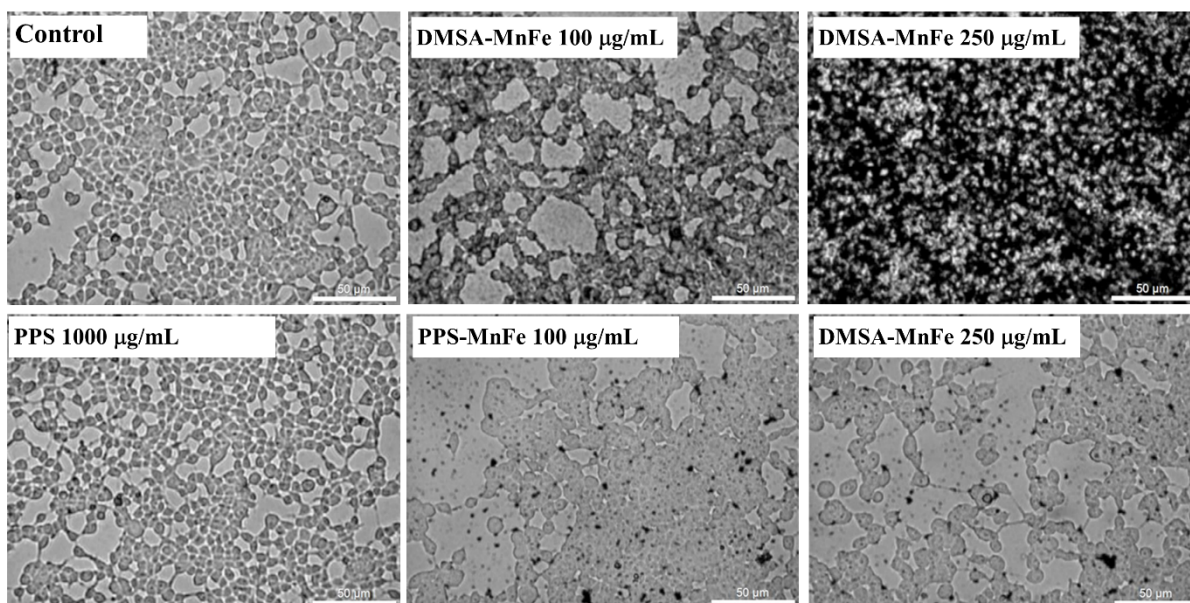

**Fig. SI 10.** Brightfield images of HEK293 cells treated with blank PPS NPs (1000 µg/mL), DMSA and PPS coated MnFe NPs at 100 µg/mL and 250 µg/mL concentrations for 72 h. *Scale bar: 50 µm*

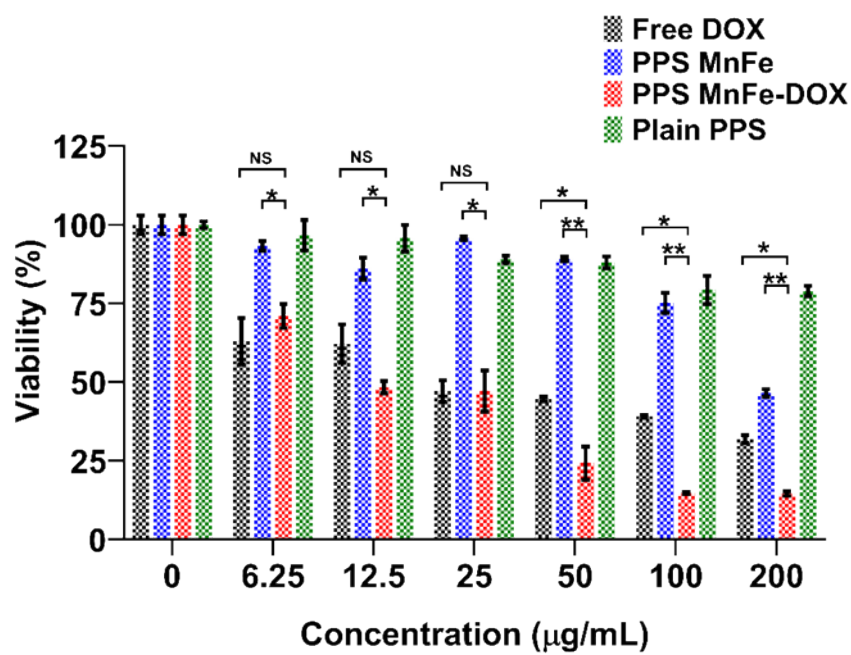

**Fig. SI 11.** Assessment of cellular toxicity of free DOX, PPS MnFe, PPS MnFe-DOX and blank PPS NPs on MCF-7 cells after 48 h of treatment by MTS assay
